# Supplementary material
Source: MDPI journal article supplement (https://www.mdpi.com/2073-4441/11/5/938)
Supplement: s1 [file s1]

Complementary Material

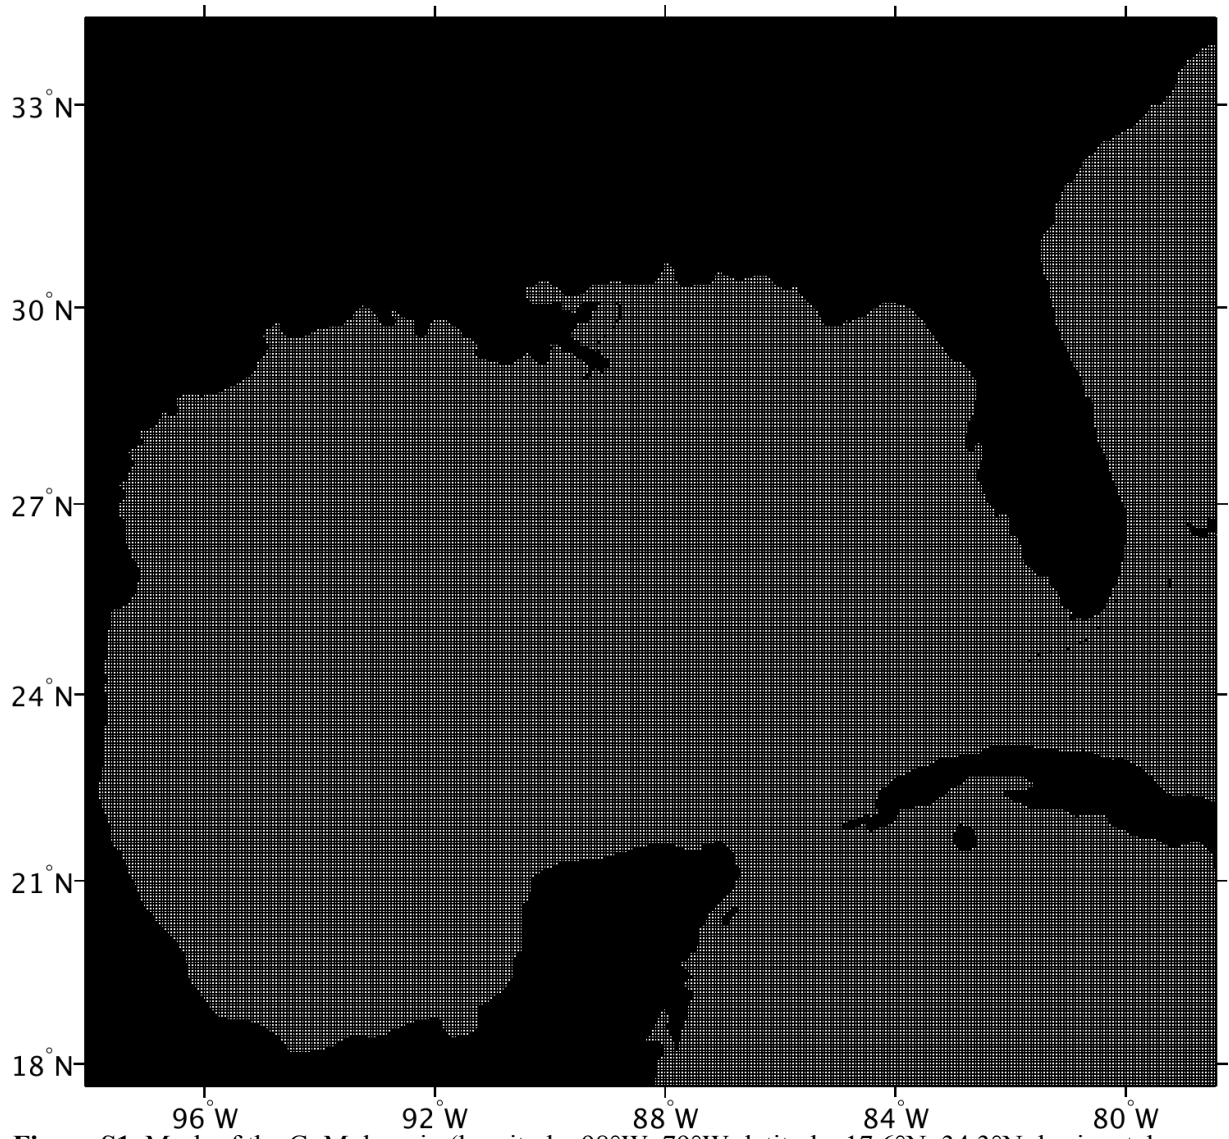

**Figure S1.** Mesh of the GoM domain (longitude:  $98^{\circ}\text{W}$ – $79^{\circ}\text{W}$ ; latitude:  $17.6^{\circ}\text{N}$ – $34.3^{\circ}\text{N}$ ; horizontal resolution: 5 km; number of vertical layers: 36).

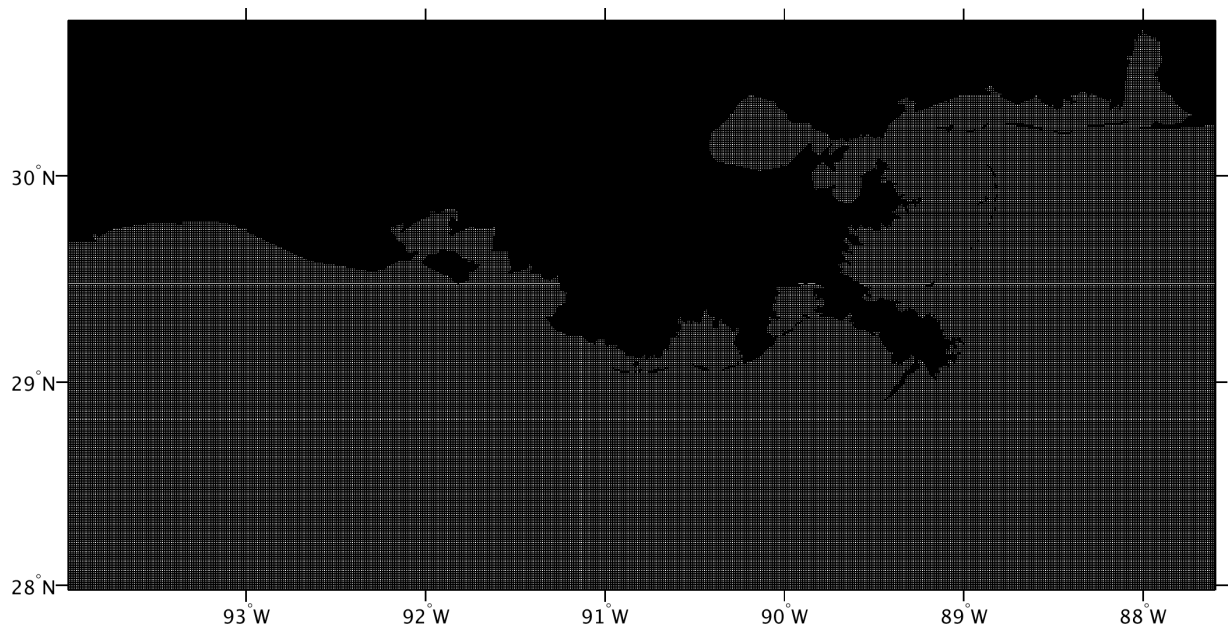

**Figure S2.** Mesh of the nGoM domain (longitude: 94°W–87.6°W; latitude: 27.9°N–30.7°N; horizontal resolution: 1 km; number of vertical layers: 24).
